# Supplementary material for: Excited state deactivation pathways of neutral/protonated anisole and p-fluoroanisole: a theoretical study
Source: Royal Society of Chemistry journal article supplement (doi:10.1039/c4cp00679h), 2014-01-01
Supplement: c4cp00679h1.pdf [file c4cp00679h1.pdf]

## Excited state deactivation pathways of neutral/protonated anisole and p-fluoroanisole:

### A Theoretical study

Reza Omidyan and Hajar Rezaei

This supplementary material section contains one Figure and two Tables:

**Figure SM1:** CC2 PE profiles of (a) protonated anisole (C4 isomer) and (b) protonated p-fluoroanisole (C2 isomer) in the electronic ground state (circles), the lowest  $^1A'$  excited state (squares) and the lowest  $^1A''$  state (triangles), as a function of the C-OCH<sub>3</sub> coordinate.

**Table SM1:** xyz coordinates revealed to the ground and S1 optimized geometry of neutral/protonated of anisole and p-fluoroanisole. All of the structures have been determined at the MP2, CC2 level of theory, respectively for the ground and excited state using the cc-pVDZ basis function. In all of relevant geometry optimizations, the Cs molecular symmetry has been taken to account.

**Table SM2:** Vertical transition energies of neutral/protonated anisole and p-fluoroanisole, computed at the CC2/ccpVDZ level of theory.

Figure SM:

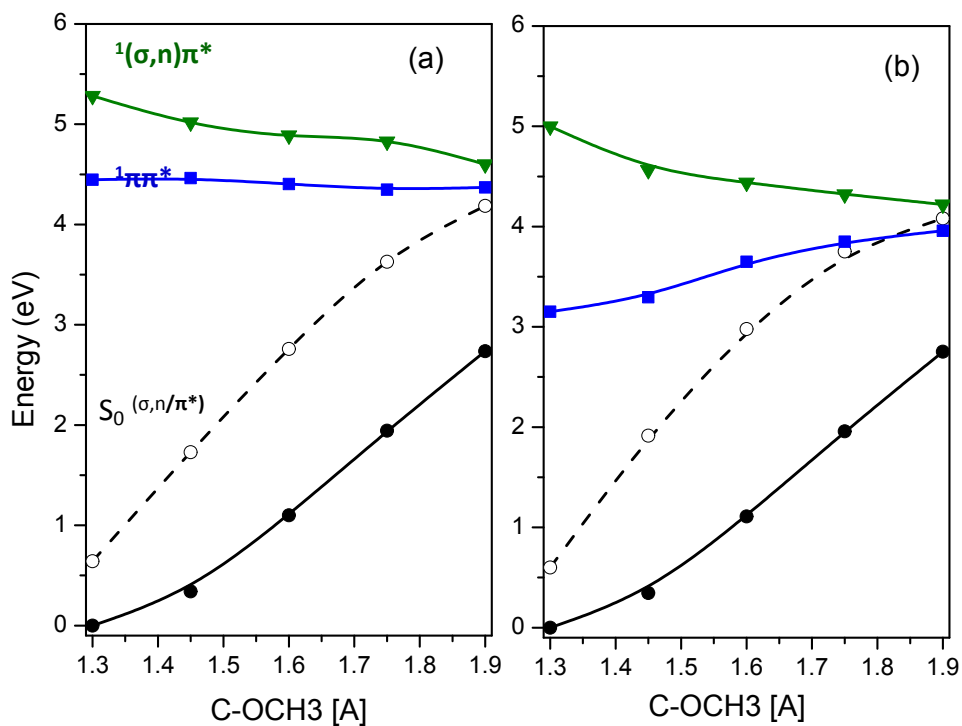

**Figure SM:** CC2 PE profiles of (a) protonated anisole (C4 isomer) and (b) protonated p-fluoroanisole (C2 isomer) in the electronic ground state (circles), the lowest <sup>1</sup>A' excited state (squares), the lowest <sup>1</sup>A'' state (triangles), as a function of the C-OCH<sub>3</sub> coordinate.

**Table SM1:**

| Neutral anisole |          |          |          |    |          |          |          |
|-----------------|----------|----------|----------|----|----------|----------|----------|
| S0              |          |          |          | S1 |          |          |          |
| O               | 0.83274  | 1.69839  | 0        | O  | 0.6573   | 1.7799   | 0        |
| C               | -1.21726 | -1.4063  | 0        | C  | -1.42631 | -1.32503 | 0        |
| C               | 0.4201   | 0.39383  | 0        | C  | 0.25262  | 0.48259  | 0        |
| C               | 1.45312  | -0.56649 | 0        | C  | 1.33509  | -0.45943 | 0        |
| C               | 1.14832  | -1.93233 | 0        | C  | 1.02571  | -1.87079 | 0        |
| C               | -0.19242 | -2.36244 | 0        | C  | -0.34802 | -2.27509 | 0        |
| C               | -0.92317 | -0.0289  | 0        | C  | -1.13745 | 0.08698  | 0        |
| C               | -0.19243 | 2.68102  | 0        | C  | -0.35878 | 2.79712  | 0        |
| H               | -2.26513 | -1.72487 | 0        | H  | -2.46301 | -1.67305 | 0        |
| H               | 2.48791  | -0.21042 | 0        | H  | 2.35803  | -0.07483 | 0        |
| H               | 1.96229  | -2.66495 | 0        | H  | 1.82428  | -2.61714 | 0        |
| H               | -0.43201 | -3.43016 | 0        | H  | -0.58917 | -3.34428 | 0        |
| H               | -1.74451 | 0.69115  | 0        | H  | -1.94573 | 0.81962  | 0        |
| H               | 0.32122  | 3.65192  | 0        | H  | 0.18565  | 3.75029  | 0        |
| H               | -0.82938 | 2.60527  | -0.89994 | H  | -0.98654 | 2.718    | -0.90271 |
| H               | -0.82938 | 2.60527  | 0.89994  | H  | -0.98654 | 2.718    | 0.90271  |

  

|                                                                                     |                                                                                      |
|-------------------------------------------------------------------------------------|--------------------------------------------------------------------------------------|
| 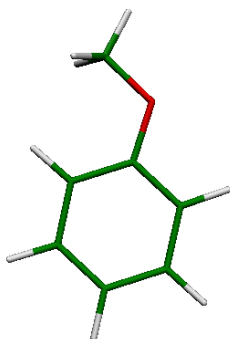 |  |
|-------------------------------------------------------------------------------------|--------------------------------------------------------------------------------------|

| Protonated anisole (C2 isomer) |          |          |          |    |          |          |          |
|--------------------------------|----------|----------|----------|----|----------|----------|----------|
| S0                             |          |          |          | S1 |          |          |          |
| H                              | -2.04965 | -0.36173 | -0.87098 | H  | -2.04588 | -0.26786 | -0.87367 |
| H                              | -2.04965 | -0.36173 | 0.87098  | H  | -2.04588 | -0.26786 | 0.87367  |
| O                              | -0.71615 | 1.67186  | 0        | O  | -0.66991 | 1.75972  | 0        |
| C                              | 1.05851  | 0.03302  | 0        | C  | 1.12048  | 0.09681  | 0        |
| C                              | 1.34052  | -1.32862 | 0        | C  | 1.48785  | -1.32985 | 0        |
| C                              | 0.33619  | -2.35597 | 0        | C  | 0.44004  | -2.27868 | 0        |
| C                              | -0.98435 | -1.99752 | 0        | C  | -0.92154 | -1.87386 | 0        |
| C                              | -1.3925  | -0.56821 | 0        | C  | -1.37919 | -0.46781 | 0        |
| C                              | -0.29704 | 0.44128  | 0        | C  | -0.22163 | 0.48478  | 0        |
| C                              | 0.2513   | 2.7655   | 0        | C  | 0.29488  | 2.85459  | 0        |
| H                              | 1.87484  | 0.757    | 0        | H  | 1.92079  | 0.84211  | 0        |
| H                              | 2.39444  | -1.63202 | 0        | H  | 2.53991  | -1.62594 | 0        |
| H                              | 0.63936  | -3.40562 | 0        | H  | 0.66466  | -3.35014 | 0        |
| H                              | -1.77758 | -2.75264 | 0        | H  | -1.69099 | -2.65783 | 0        |
| H                              | -0.36065 | 3.67335  | 0        | H  | -0.31814 | 3.76272  | 0        |
| H                              | 0.86619  | 2.71102  | 0.90982  | H  | 0.91359  | 2.79518  | 0.9095   |
| H                              | 0.86619  | 2.71102  | -0.90982 | H  | 0.91359  | 2.79518  | -0.9095  |

  

|                                                                                    |                                                                                     |
|------------------------------------------------------------------------------------|-------------------------------------------------------------------------------------|
| 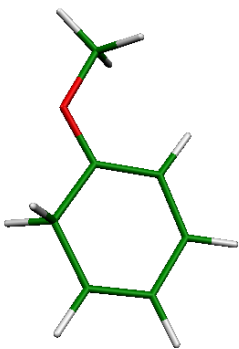 |  |
|------------------------------------------------------------------------------------|-------------------------------------------------------------------------------------|

| Protonated anisole (C3 isomer)                                                      |          |          |          |                                                                                      |          |          |          |
|-------------------------------------------------------------------------------------|----------|----------|----------|--------------------------------------------------------------------------------------|----------|----------|----------|
| S0                                                                                  |          |          |          | S1                                                                                   |          |          |          |
| H                                                                                   | 2.34791  | 1.58141  | -0.8549  | H                                                                                    | 2.40584  | 1.53035  | -0.87217 |
| H                                                                                   | 2.34791  | 1.58141  | 0.8549   | H                                                                                    | 2.40584  | 1.53035  | 0.87217  |
| O                                                                                   | -1.81721 | 0.76377  | 0        | O                                                                                    | -1.79318 | 0.6629   | 0        |
| C                                                                                   | -0.5469  | 0.37047  | 0        | C                                                                                    | -0.45911 | 0.26134  | 0        |
| C                                                                                   | 0.42985  | 1.38082  | 0        | C                                                                                    | 0.43365  | 1.29898  | 0        |
| C                                                                                   | 1.85559  | 1.05499  | 0        | C                                                                                    | 1.9131   | 1.0408   | 0        |
| C                                                                                   | 2.25308  | -0.3556  | 0        | C                                                                                    | 2.23259  | -0.42149 | 0        |
| C                                                                                   | 1.27547  | -1.33674 | 0        | C                                                                                    | 1.27785  | -1.4515  | 0        |
| C                                                                                   | -0.09598 | -0.98054 | 0        | C                                                                                    | -0.09481 | -1.16731 | 0        |
| C                                                                                   | -2.84459 | -0.25039 | 0        | C                                                                                    | -2.87798 | -0.32856 | 0        |
| H                                                                                   | 0.10594  | 2.42807  | 0        | H                                                                                    | 0.04873  | 2.32544  | 0        |
| H                                                                                   | 3.31781  | -0.61095 | 0        | H                                                                                    | 3.29478  | -0.70161 | 0        |
| H                                                                                   | 1.5457   | -2.39648 | 0        | H                                                                                    | 1.61753  | -2.49219 | 0        |
| H                                                                                   | -0.8329  | -1.79039 | 0        | H                                                                                    | -0.84352 | -1.96327 | 0        |
| H                                                                                   | -3.78937 | 0.30435  | 0        | H                                                                                    | -3.79228 | 0.27464  | 0        |
| H                                                                                   | -2.77615 | -0.87211 | -0.90745 | H                                                                                    | -2.78689 | -0.93873 | -0.9118  |
| H                                                                                   | -2.77615 | -0.87211 | 0.90745  | H                                                                                    | -2.78689 | -0.93873 | 0.9118   |
| 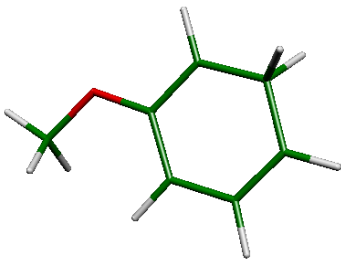 |          |          |          |  |          |          |          |

| Protonated anisole (C2 isomer)                                                      |          |          |          |                                                                                      |          |          |          |
|-------------------------------------------------------------------------------------|----------|----------|----------|--------------------------------------------------------------------------------------|----------|----------|----------|
| S0                                                                                  |          |          |          | S1                                                                                   |          |          |          |
| C                                                                                   | -2.28851 | -0.3553  | 0        | C                                                                                    | -2.38316 | -0.36071 | 0        |
| C                                                                                   | -1.24769 | -1.40963 | 0        | C                                                                                    | -1.28853 | -1.40363 | 0        |
| C                                                                                   | -1.78614 | 1.04028  | 0        | C                                                                                    | -1.84268 | 1.02569  | 0        |
| C                                                                                   | -0.45032 | 1.32661  | 0        | C                                                                                    | -0.44824 | 1.29207  | 0        |
| C                                                                                   | 0.5104   | 0.25343  | 0        | C                                                                                    | 0.56103  | 0.18288  | 0        |
| C                                                                                   | 0.09183  | -1.12544 | 0        | C                                                                                    | 0.09953  | -1.12775 | 0        |
| H                                                                                   | -2.96487 | -0.51008 | 0.86868  | H                                                                                    | -3.07173 | -0.47157 | 0.87126  |
| H                                                                                   | -1.57404 | -2.45607 | 0        | H                                                                                    | -1.60455 | -2.45355 | 0        |
| H                                                                                   | -2.51768 | 1.85598  | 0        | H                                                                                    | -2.53504 | 1.87885  | 0        |
| H                                                                                   | -0.06727 | 2.35054  | 0        | H                                                                                    | -0.07394 | 2.32361  | 0        |
| O                                                                                   | 1.75087  | 0.63845  | 0        | O                                                                                    | 1.82027  | 0.68653  | 0        |
| H                                                                                   | 0.8267   | -1.93226 | 0        | H                                                                                    | 0.79101  | -1.97566 | 0        |
| C                                                                                   | 2.835    | -0.34154 | 0        | C                                                                                    | 2.88733  | -0.29466 | 0        |
| H                                                                                   | 3.74722  | 0.26391  | 0        | H                                                                                    | 3.81592  | 0.28728  | 0        |
| H                                                                                   | 2.77626  | -0.95429 | 0.91059  | H                                                                                    | 2.81554  | -0.91956 | 0.90642  |
| H                                                                                   | 2.77626  | -0.95429 | -0.91059 | H                                                                                    | 2.81554  | -0.91956 | -0.90642 |
| H                                                                                   | -2.96487 | -0.51008 | -0.86868 | H                                                                                    | -3.07173 | -0.47157 | -0.87126 |
| 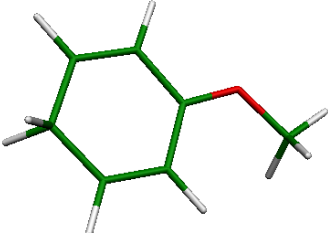 |          |          |          |  |          |          |          |

| Protonated anisole (C5 isomer)                                                      |          |          |          |                                                                                      |          |          |          |
|-------------------------------------------------------------------------------------|----------|----------|----------|--------------------------------------------------------------------------------------|----------|----------|----------|
| S0                                                                                  |          |          |          | S1                                                                                   |          |          |          |
| H                                                                                   | -1.81093 | 1.62237  | -0.85733 | H                                                                                    | -2.09271 | 1.64512  | -0.87497 |
| H                                                                                   | -1.81093 | 1.62237  | 0.85733  | H                                                                                    | -2.09271 | 1.64512  | 0.87497  |
| O                                                                                   | 0.87995  | -1.7928  | 0        | O                                                                                    | 0.61223  | -1.77496 | 0        |
| C                                                                                   | -0.14026 | -2.81169 | 0        | C                                                                                    | -0.37009 | -2.87127 | 0        |
| C                                                                                   | -0.85667 | -0.06753 | 0        | C                                                                                    | -1.11763 | -0.08066 | 0        |
| C                                                                                   | -1.13822 | 1.37497  | 0        | C                                                                                    | -1.45316 | 1.39135  | 0        |
| C                                                                                   | -0.01512 | 2.31552  | 0        | C                                                                                    | -0.22881 | 2.26156  | 0        |
| C                                                                                   | 1.28654  | 1.83774  | 0        | C                                                                                    | 1.10714  | 1.79398  | 0        |
| C                                                                                   | 1.51081  | 0.44422  | 0        | C                                                                                    | 1.38082  | 0.43585  | 0        |
| C                                                                                   | 0.46938  | -0.52618 | 0        | C                                                                                    | 0.19639  | -0.48367 | 0        |
| H                                                                                   | 0.40285  | -3.76312 | 0        | H                                                                                    | 0.24026  | -3.78039 | 0        |
| H                                                                                   | -0.76265 | -2.7329  | 0.90668  | H                                                                                    | -0.97925 | -2.7801  | 0.9117   |
| H                                                                                   | -0.76265 | -2.7329  | -0.90668 | H                                                                                    | -0.97925 | -2.7801  | -0.9117  |
| H                                                                                   | -1.70542 | -0.75723 | 0        | H                                                                                    | -1.93998 | -0.80367 | 0        |
| H                                                                                   | -0.22516 | 3.39077  | 0        | H                                                                                    | -0.39654 | 3.34726  | 0        |
| H                                                                                   | 2.14097  | 2.51999  | 0        | H                                                                                    | 1.92307  | 2.524    | 0        |
| H                                                                                   | 2.53749  | 0.05639  | 0        | H                                                                                    | 2.38231  | -0.00385 | 0        |
| 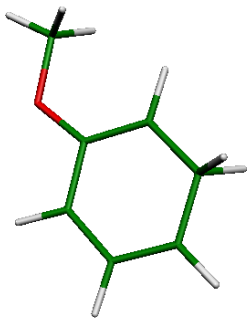 |          |          |          |  |          |          |          |

| Protonated anisole (C6 isomer)                                                      |          |          |          |                                                                                      |          |          |          |
|-------------------------------------------------------------------------------------|----------|----------|----------|--------------------------------------------------------------------------------------|----------|----------|----------|
| S0                                                                                  |          |          |          | S1                                                                                   |          |          |          |
| H                                                                                   | -1.42685 | 0.43304  | -0.87369 | H                                                                                    | -1.74648 | 0.53679  | -0.87666 |
| O                                                                                   | 0.8675   | 1.65164  | 0        | O                                                                                    | 0.65663  | 1.77279  | 0        |
| C                                                                                   | 0.51018  | 0.40111  | 0        | C                                                                                    | 0.2503   | 0.48175  | 0        |
| C                                                                                   | 1.55361  | -0.55684 | 0        | C                                                                                    | 1.3085   | -0.45675 | 0        |
| C                                                                                   | 1.22996  | -1.9038  | 0        | C                                                                                    | 1.06605  | -1.88156 | 0        |
| C                                                                                   | -0.12694 | -2.38886 | 0        | C                                                                                    | -0.29129 | -2.30647 | 0        |
| C                                                                                   | -1.16195 | -1.49653 | 0        | C                                                                                    | -1.35354 | -1.374   | 0        |
| C                                                                                   | -0.91611 | -0.02636 | 0        | C                                                                                    | -1.20279 | 0.11019  | 0        |
| C                                                                                   | -0.14074 | 2.70293  | 0        | C                                                                                    | -0.33107 | 2.8451   | 0        |
| H                                                                                   | 2.58944  | -0.2078  | 0        | H                                                                                    | 2.32914  | -0.05991 | 0        |
| H                                                                                   | 2.04784  | -2.63375 | 0        | H                                                                                    | 1.89481  | -2.59371 | 0        |
| H                                                                                   | -0.31361 | -3.46557 | 0        | H                                                                                    | -0.5397  | -3.37296 | 0        |
| H                                                                                   | -2.20405 | -1.83203 | 0        | H                                                                                    | -2.37951 | -1.76666 | 0        |
| H                                                                                   | -1.42685 | 0.43304  | 0.87369  | H                                                                                    | -1.74648 | 0.53679  | 0.87666  |
| H                                                                                   | 0.43236  | 3.6358   | 0        | H                                                                                    | 0.26606  | 3.76413  | 0        |
| H                                                                                   | -0.75689 | 2.62699  | -0.90814 | H                                                                                    | -0.95054 | 2.79028  | -0.90874 |
| H                                                                                   | -0.75689 | 2.62699  | 0.90814  | H                                                                                    | -0.95054 | 2.79028  | 0.90874  |
| 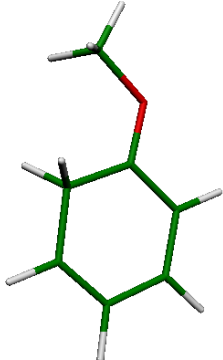 |          |          |          |  |          |          |          |



| p-fluoroanisole |          |          |          |    |          |          |          |
|-----------------|----------|----------|----------|----|----------|----------|----------|
| S0              |          |          |          | S1 |          |          |          |
| C               | -0.4423  | 0.39282  | 0        | C  | -1.00636 | 0.26822  | 0        |
| C               | 0.44139  | 1.49223  | 0        | C  | -0.1511  | 1.42079  | 0        |
| C               | 1.82654  | 1.29522  | 0        | C  | 1.27687  | 1.22445  | 0        |
| C               | 2.32918  | -0.01206 | 0        | C  | 1.74448  | -0.11943 | 0        |
| C               | 1.4747   | -1.11373 | 0        | C  | 0.91014  | -1.27856 | 0        |
| C               | 0.08057  | -0.91469 | 0        | C  | -0.51459 | -1.08904 | 0        |
| F               | 3.66801  | -0.20642 | 0        | F  | 3.0766   | -0.32166 | 0        |
| O               | -1.77372 | 0.70867  | 0        | O  | -2.32776 | 0.57552  | 0        |
| C               | -2.67597 | -0.38787 | 0        | C  | -3.27094 | -0.51195 | 0        |
| H               | 0.01556  | 2.49987  | 0        | H  | -0.61115 | 2.41138  | 0        |
| H               | 2.51942  | 2.14129  | 0        | H  | 1.99028  | 2.05053  | 0        |
| H               | 1.89662  | -2.12265 | 0        | H  | 1.36906  | -2.26945 | 0        |
| H               | -0.57334 | -1.7892  | 0        | H  | -1.18536 | -1.94867 | 0        |
| H               | -3.68292 | 0.05058  | 0        | H  | -4.25987 | -0.03599 | 0        |
| H               | -2.55187 | -1.01704 | -0.90015 | H  | -3.1453  | -1.1307  | -0.90323 |
| H               | -2.55187 | -1.01704 | 0.90015  | H  | -3.1453  | -1.1307  | 0.90323  |

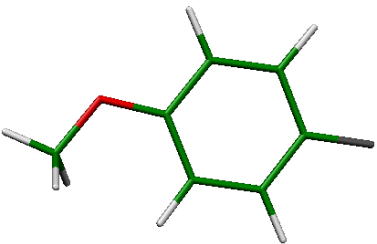


| Protonated p-fluoroanisole (C2 isomer)                                              |          |          |          |                                                                                      |          |          |          |
|-------------------------------------------------------------------------------------|----------|----------|----------|--------------------------------------------------------------------------------------|----------|----------|----------|
| S0                                                                                  |          |          |          | S1                                                                                   |          |          |          |
| C                                                                                   | -0.48029 | 0.26025  | 0        | C                                                                                    | -1.00151 | 0.23838  | 0        |
| C                                                                                   | 0.4244   | 1.44348  | 0        | C                                                                                    | -0.16491 | 1.48921  | 0        |
| C                                                                                   | 1.88707  | 1.18204  | 0        | C                                                                                    | 1.28344  | 1.16928  | 0        |
| C                                                                                   | 2.34428  | -0.10363 | 0        | C                                                                                    | 1.75972  | -0.15048 | 0        |
| C                                                                                   | 1.43092  | -1.20916 | 0        | C                                                                                    | 0.90799  | -1.3359  | 0        |
| C                                                                                   | 0.05249  | -1.05516 | 0        | C                                                                                    | -0.48214 | -1.08721 | 0        |
| O                                                                                   | -1.74311 | 0.55978  | 0        | O                                                                                    | -2.3011  | 0.55372  | 0        |
| C                                                                                   | -2.7447  | -0.50524 | 0        | C                                                                                    | -3.30025 | -0.51061 | 0        |
| F                                                                                   | 3.64125  | -0.39401 | 0        | F                                                                                    | 3.06143  | -0.33339 | 0        |
| H                                                                                   | 2.58375  | 2.02582  | 0        | H                                                                                    | 2.02832  | 1.97558  | 0        |
| H                                                                                   | 1.86177  | -2.21774 | 0        | H                                                                                    | 1.34857  | -2.33503 | 0        |
| H                                                                                   | -0.58968 | -1.93742 | 0        | H                                                                                    | -1.16888 | -1.93838 | 0        |
| H                                                                                   | -3.70408 | 0.02215  | 0        | H                                                                                    | -4.26154 | 0.01519  | 0        |
| H                                                                                   | -2.633   | -1.11117 | -0.91048 | H                                                                                    | -3.18831 | -1.12059 | -0.90991 |
| H                                                                                   | -2.633   | -1.11117 | 0.91048  | H                                                                                    | -3.18831 | -1.12059 | 0.90991  |
| H                                                                                   | 0.15097  | 2.07558  | 0.87136  | H                                                                                    | -0.42981 | 2.12543  | 0.87652  |
| H                                                                                   | 0.15097  | 2.07558  | -0.87136 | H                                                                                    | -0.42981 | 2.12543  | -0.87652 |
| 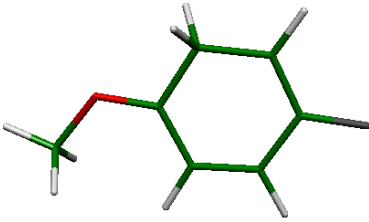 |          |          |          |  |          |          |          |

| Protonated p-fluoroanisole (C3 isomer) |          |          |          |    |          |          |          |
|----------------------------------------|----------|----------|----------|----|----------|----------|----------|
| S0                                     |          |          |          | S1 |          |          |          |
| C                                      | -1.00151 | 0.23838  | 0        | O  | -2.09874 | 0.53037  | -1.01063 |
| C                                      | -0.16491 | 1.48921  | 0        | C  | -0.89774 | 0.26579  | -0.42864 |
| C                                      | 1.28344  | 1.16928  | 0        | C  | -0.22695 | 1.38057  | 0.01497  |
| C                                      | 1.75972  | -0.15048 | 0        | C  | 1.1153   | 1.29776  | 0.6854   |
| C                                      | 0.90799  | -1.3359  | 0        | C  | 1.54693  | -0.12749 | 0.76964  |
| C                                      | -0.48214 | -1.08721 | 0        | C  | 0.84983  | -1.27223 | 0.30992  |
| O                                      | -2.3011  | 0.55372  | 0        | C  | -0.3855  | -1.13792 | -0.30164 |
| C                                      | -3.30025 | -0.51061 | 0        | C  | -2.94121 | -0.55673 | -1.53838 |
| F                                      | 3.06143  | -0.33339 | 0        | F  | 2.7191   | -0.31913 | 1.34391  |
| H                                      | 2.02832  | 1.97558  | 0        | H  | 1.09963  | 1.73833  | 1.70773  |
| H                                      | 1.34857  | -2.33503 | 0        | H  | 1.89014  | 1.88525  | 0.14319  |
| H                                      | -1.16888 | -1.93838 | 0        | H  | -0.70004 | 2.35816  | -0.13226 |
| H                                      | -4.26154 | 0.01519  | 0        | H  | 1.3229   | -2.24864 | 0.45726  |
| H                                      | -3.18831 | -1.12059 | -0.90991 | H  | -0.94494 | -2.00171 | -0.66542 |
| H                                      | -3.18831 | -1.12059 | 0.90991  | H  | -3.82164 | -0.03954 | -1.93467 |
| H                                      | -0.42981 | 2.12543  | 0.87652  | H  | -2.38495 | -1.07628 | -2.33233 |
| H                                      | -0.42981 | 2.12543  | -0.87652 | H  | -3.20531 | -1.22875 | -0.70871 |

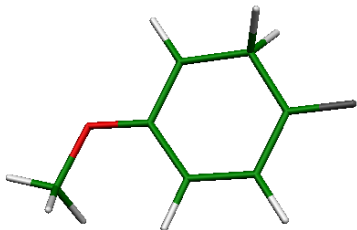


| Protonated p-fluoroanisole (C5 isomer) |          |          |          |    |          |          |          |
|----------------------------------------|----------|----------|----------|----|----------|----------|----------|
| S0                                     |          |          |          | S1 |          |          |          |
| H                                      | 1.72491  | 1.70907  | 0.86792  | H  | 0.88325  | 2.17714  | 0.84011  |
| H                                      | 1.72491  | 1.70907  | -0.86792 | H  | 1.80097  | 1.63302  | -0.56177 |
| O                                      | -1.84576 | -0.78438 | 0        | O  | -2.01323 | -0.5812  | -1.09235 |
| C                                      | -0.56039 | -0.4271  | 0        | C  | -0.87598 | -0.24185 | -0.47957 |
| C                                      | 0.35375  | -1.53005 | 0        | C  | -0.33212 | -1.39169 | 0.32274  |
| C                                      | 1.74743  | -1.40208 | 0        | C  | 0.84549  | -1.15362 | 1.00124  |
| C                                      | 2.27357  | -0.11652 | 0        | C  | 1.4692   | 0.11627  | 0.91666  |
| C                                      | 1.42449  | 1.0781   | 0        | C  | 1.00672  | 1.31492  | 0.14867  |
| C                                      | -0.0397  | 0.86505  | 0        | C  | -0.27896 | 1.00718  | -0.57354 |
| C                                      | -2.81197 | 0.28446  | 0        | C  | -2.73421 | 0.38699  | -1.94011 |
| F                                      | 3.56744  | 0.0739   | 0        | F  | 2.59834  | 0.3003   | 1.5844   |
| H                                      | -0.09386 | -2.53196 | 0        | H  | -0.88119 | -2.33606 | 0.32985  |
| H                                      | 2.40404  | -2.27595 | 0        | H  | 1.33038  | -1.91935 | 1.61587  |
| H                                      | -0.67793 | 1.75209  | 0        | H  | -0.72936 | 1.80196  | -1.17686 |
| H                                      | -3.79014 | -0.2089  | 0        | H  | -3.60731 | -0.17013 | -2.29543 |
| H                                      | -2.70039 | 0.90259  | 0.9064   | H  | -3.02175 | 1.24371  | -1.31366 |
| H                                      | -2.70039 | 0.90259  | -0.9064  | H  | -2.07064 | 0.67979  | -2.76655 |

  

|                                                                                     |                                                                                      |
|-------------------------------------------------------------------------------------|--------------------------------------------------------------------------------------|
| 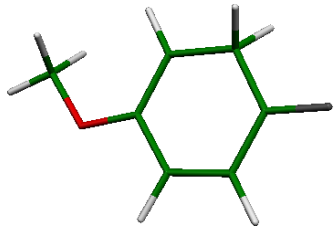 |  |
|-------------------------------------------------------------------------------------|--------------------------------------------------------------------------------------|

| Protonated p-fluoroanisole (C6 isomer) |          |          |          |    |          |          |          |
|----------------------------------------|----------|----------|----------|----|----------|----------|----------|
| S0                                     |          |          |          | S1 |          |          |          |
| F                                      | 3.68144  | -0.0937  | 0        | F  | 3.06326  | -0.30566 | 0        |
| O                                      | -1.71117 | 0.76821  | 0        | O  | -2.29215 | 0.6001   | 0        |
| C                                      | -0.44423 | 0.48426  | 0        | C  | -0.99511 | 0.2616   | 0        |
| C                                      | 0.45105  | 1.58605  | 0        | C  | -0.10659 | 1.39434  | 0        |
| C                                      | 1.81174  | 1.34247  | 0        | C  | 1.28369  | 1.26668  | 0        |
| C                                      | 2.35671  | 0.01182  | 0        | C  | 1.76707  | -0.10659 | 0        |
| C                                      | 1.54648  | -1.08466 | 0        | C  | 0.94295  | -1.24527 | 0        |
| C                                      | 0.06762  | -0.91356 | 0        | C  | -0.55017 | -1.17655 | 0        |
| C                                      | -2.70408 | -0.29963 | 0        | C  | -3.31373 | -0.44082 | 0        |
| H                                      | -0.36815 | -1.44481 | 0.87406  | H  | -0.94793 | -1.73386 | 0.87942  |
| H                                      | -0.36815 | -1.44481 | -0.87406 | H  | -0.94793 | -1.73386 | -0.87942 |
| H                                      | 0.04496  | 2.60092  | 0        | H  | -0.58414 | 2.38028  | 0        |
| H                                      | 2.518    | 2.18098  | 0        | H  | 1.98244  | 2.10522  | 0        |
| H                                      | 1.96636  | -2.09457 | 0        | H  | 1.44157  | -2.22318 | 0        |
| H                                      | -3.66791 | 0.21954  | 0        | H  | -4.26219 | 0.10821  | 0        |
| H                                      | -2.59034 | -0.90925 | -0.90861 | H  | -3.22765 | -1.0559  | -0.9089  |
| H                                      | -2.59034 | -0.90925 | 0.90861  | H  | -3.22765 | -1.0559  | 0.9089   |

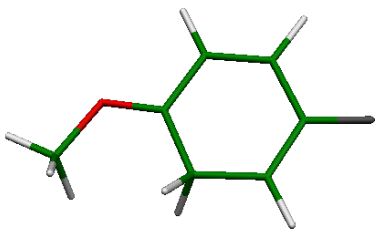


**Table SM2 :**

| State                                  | Energy/eV | Oscillator Strength | Configuration*                                        |
|----------------------------------------|-----------|---------------------|-------------------------------------------------------|
| Neutral anisole                        |           |                     |                                                       |
| S1 (1A'/ $\pi\pi^*$ )                  | 5.03      | 0.029               | 5a''-6a''(73%)/H->L                                   |
| S2 (2A'/ $\pi\pi^*$ )                  | 6.22      | 0.150               | 5a''-7a''(74%)/H->L+1                                 |
| S3 (3A'/ $\pi\pi^*$ )                  | 7.15      | 0.062               | 4a''-7a''(39%)/H-1->L+1,<br>4a''-6a''(14%) / H-1->L+1 |
| S4 (1A''/ $\pi\sigma^*$ )              | 7.31      | 0.002               | 5a''-25a'(83%)                                        |
| Protonated Anisole (C4 isomer)         |           |                     |                                                       |
| S1 (1A'/ $\pi\pi^*$ )                  | 4.77      | 0.142               | 5a''-6a''(80%)/H->L                                   |
| S2 (2A'/ $\pi\pi^*$ )                  | 5.24      | 0.374               | 4a''-6a''(88%)/H-1->L                                 |
| S3 (1A''/ $\sigma, n\pi^*$ )           | 5.65      | 0.0003              | 24a'-6a''(96%)/H-2->L                                 |
| S4 (2A''/ $\sigma, n\pi^*$ )           | 6.94      | 0.0002              | 23a'-6a''(42%)/H-3->L<br>, 22a'-6a''(30%)/H-4->L      |
| p-Fluoroanisole                        |           |                     |                                                       |
| S1 (1A'/ $\pi\pi^*$ )                  | 4.81      | 0.048               | 6a''-7a''(81%)/H->L                                   |
| S2 (2A'/ $\pi\pi^*$ )                  | 6.29      | 0.095               | 6a''-8a''(77%)/H->L+1                                 |
| S3 (1A''/ $\pi\sigma^*$ )              | 7.22      | 0.078               | 6a''-29a' (78%)/H->L+2                                |
| S4 (2A''/ $\pi\sigma^*$ )              | 7.94      | 0.0003              | 5a''-29a' (80%)/H-1->L+2                              |
| Protonated p-Fluoroanisole (C2 isomer) |           |                     |                                                       |
| S1 (1A'/ $\pi\pi^*$ )                  | 3.40      | 0.187               | 6a''-7a''(93%)/H->L                                   |
| S2 (1A''/ $\sigma, n\pi^*$ )           | 5.43      | 0.002               | 27a'-7a''(94%)/H->L                                   |
| S3 (1A''/ $\sigma, n\pi^*$ )           | 6.31      | 0.0006              | 26a'-7a''(52%)/H-2->L<br>25a'-7a''(32%)/H-3->L        |
| S4 (2A''/ $\sigma, n\pi^*$ )           | 3.35      | 0.0001              | 25a'-7a''(56%)/H-3->L<br>24a'-7a''(20%)/H-4->L        |

\*H and L denotes to the HOMO and LUMO orbitales respectively.
